# Supplementary material for: Fecal Microbial Transplantation versus Mesalamine Enema for Treatment of Active Left-Sided Ulcerative Colitis—Results of a Randomized Controlled Trial
Source: MDPI journal article supplement (doi:10.3390/jcm10132753), 2021-06-22
Supplement: s1 [file s1]

**Table S1.** Study exclusion criteria.

|                                                                                                                                              |
|----------------------------------------------------------------------------------------------------------------------------------------------|
| Anti-TNF medication and other biologic therapy in the previous 12 weeks                                                                      |
| Rectal corticosteroids or 5-aminosalicylate in the previous 4 weeks                                                                          |
| Calcineurin inhibitors in the previous 12 weeks                                                                                              |
| Methotrexate in the previous 8 weeks                                                                                                         |
| Prednisone > 10mg                                                                                                                            |
| Antibiotics or probiotics in the previous 8 weeks                                                                                            |
| The real risk of colectomy in the near future                                                                                                |
| Positive stool culture ( <i>Salmonella</i> , <i>Shigella</i> , <i>Yersinia</i> , <i>Campylobacter</i> , pathogenic <i>Escherichia coli</i> ) |
| Cytomegalovirus infection, <i>Clostridium difficile</i> infection                                                                            |
| Pregnancy, breastfeeding women                                                                                                               |
| Indeterminate colitis, Crohn's disease, irritable bowel syndrome                                                                             |
| History of bowel cancer                                                                                                                      |
| Age > 70 years                                                                                                                               |
