# Supplementary material for: Fecal Microbial Transplantation versus Mesalamine Enema for Treatment of Active Left-Sided Ulcerative Colitis—Results of a Randomized Controlled Trial
Source: MDPI journal article supplement (doi:10.3390/jcm10132753), 2021-06-22
Supplement: s1 [file s1]

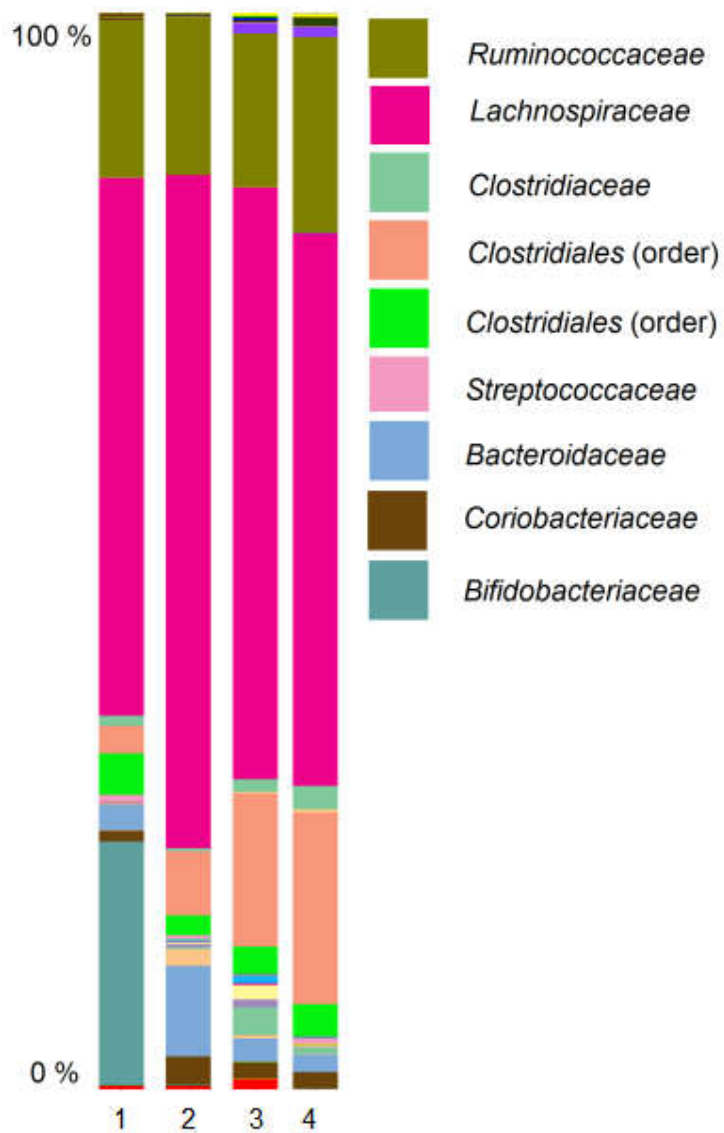

**Figure S1.** Relative abundance of common bacterial families of stool donors from (1) General University Hospital, Prague, (2) ISCARE, (3) University Hospital in Pilsen, and (4) IKEM.
