# Supplementary material for: Fecal Microbial Transplantation versus Mesalamine Enema for Treatment of Active Left-Sided Ulcerative Colitis—Results of a Randomized Controlled Trial
Source: MDPI journal article supplement (doi:10.3390/jcm10132753), 2021-06-22
Supplement: s1 [file s1]

**Table S2.** Donor examination.

|                                                                                                                                                                                     |
|-------------------------------------------------------------------------------------------------------------------------------------------------------------------------------------|
| <b>Blood test: hepatitis A, B, C, HIV-1, HIV-2, <i>Treponema pallidum</i></b>                                                                                                       |
| <b>Blood test for active infection: cytomegalovirus, Epstein-Barr, herpes simplex, Varicella zoster</b>                                                                             |
| <b>Stool tests: <i>Yersinia spp.</i>, <i>Salmonella spp.</i>, <i>Shigella spp.</i>, <i>Campylobacter jejuni</i>, <i>Clostridium difficile</i> toxin, <i>Helicobacter pylori</i></b> |
| <b>Parasitological examination</b>                                                                                                                                                  |
