# Supplementary material for: Fecal Microbial Transplantation versus Mesalamine Enema for Treatment of Active Left-Sided Ulcerative Colitis—Results of a Randomized Controlled Trial
Source: MDPI journal article supplement (doi:10.3390/jcm10132753), 2021-06-22
Supplement: s1 [file s1]

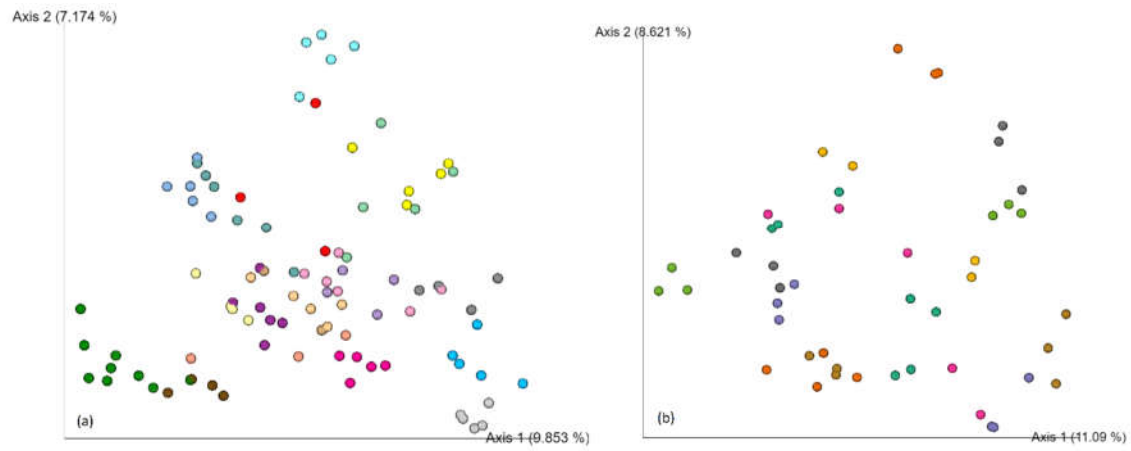

**Figure S2.** Principal coordinate analysis showing Bray Curtis distance matrix between patients treated by (a) aminosalicylates and (b) faecal microbial transplantation. Stool donors are showed as red dots, other colours represent patients.
